# Supplementary material
Source: publisher site journal article supplement (https://natureconservation.pensoft.net/article/20063/download/suppl/31/)

Supporting information

Table S1. Environmental variables used in this study

| Code | Variables | Type | Source |
| --- | --- | --- | --- |
| BLD | Bulk Density | Soil | [www.soilgrids.org](http://www.soilgrids.org/) |
| CEC | Cation Exchange Capacity | Soil | [www.soilgrids.org](http://www.soilgrids.org/) |
| CLYPPT | Soil Texture Fraction Clay | Soil | [www.soilgrids.org](http://www.soilgrids.org/) |
| CRFVOL | Coarse Fragments Volumetric | Soil | [www.soilgrids.org](http://www.soilgrids.org/) |
| OCSTHA | Soil Organic Carbon Stock | Soil | [www.soilgrids.org](http://www.soilgrids.org/) |
| PHIHOX | Soil PH | Soil | [www.soilgrids.org](http://www.soilgrids.org/) |
| SLTPPT | Soil Texture Fraction Silt | Soil | [www.soilgrids.org](http://www.soilgrids.org/) |
| SNDPPT | Soil Texture Fraction Sand | Soil | [www.soilgrids.org](http://www.soilgrids.org/) |
| Alt | Altitude | Topography | www.worldclim.org |
| Bio1 | Annual Mean Temperature | Climate | www.worldclim.org |
| Bio4 | Temperature Seasonality | Climate | www.worldclim.org |
| Bio12 | Annual Precipitation | Climate | www.worldclim.org |
| Bio15 | Precipitation Seasonality | Climate | www.worldclim.org |
| HF | Human Footprint | Natural State | http://sedac.ciesin.columbia.edu/wildareas |

Table S2. Potential nature reserves overlapped with priority conservation areas for PSESP

| Nature Reserve | *Cathaya*  *argyrophylla* | *Taxus*  *cuspidata* | *Annamocarya*  *sinensis* | *Ulmus*  *elongata* | *Tsoongiodendron*  *odorum* | *Madhuca*  *pasquieri* | Total |
| --- | --- | --- | --- | --- | --- | --- | --- |
| Shengjin Lake | 456 | 0 | 0 | 0 | 0 | 0 | 456 |
| An'jilongwangshan | 180 | 0 | 0 | 0 | 0 | 32 | 212 |
| Baiqingzhai | 0 | 20 | 0 | 0 | 0 | 0 | 20 |
| Baishilazi | 0 | 153 | 0 | 0 | 0 | 0 | 153 |
| Baishuijiang | 0 | 0 | 1744 | 0 | 0 | 0 | 1744 |
| Bamianshan | 0 | 0 | 0 | 179 | 0 | 0 | 179 |
| Bangxipolu | 0 | 0 | 0 | 0 | 2 | 0 | 2 |
| Banli | 0 | 0 | 0 | 0 | 229 | 0 | 229 |
| Baokang yeshenglamei | 0 | 0 | 54 | 0 | 0 | 0 | 54 |
| Bapen | 0 | 0 | 0 | 0 | 24 | 0 | 24 |
| Bawangling | 0 | 0 | 0 | 0 | 4 | 0 | 4 |
| Chachayalaishan | 0 | 0 | 0 | 0 | 19 | 0 | 19 |
| Changbaishan | 0 | 2966 | 0 | 0 | 0 | 0 | 2966 |
| Changjiangtianeezhoubaijitun | 31 | 0 | 0 | 0 | 0 | 0 | 31 |
| Changjiangxinluoduanbaijitun | 88 | 0 | 0 | 0 | 0 | 0 | 88 |
| Changningzuhai | 0 | 0 | 149 | 0 | 0 | 149 | 298 |
| Changqing | 0 | 0 | 10 | 0 | 0 | 0 | 10 |
| Chatianshan | 0 | 0 | 0 | 53 | 0 | 0 | 53 |
| China Danxia | 0 | 0 | 0 | 250 | 0 | 61 | 311 |
| Chunxiushuiyuanlin | 0 | 0 | 0 | 0 | 55 | 0 | 55 |
| Ci-lan | 0 | 0 | 0 | 185 | 0 | 0 | 185 |
| Coastal Range Taitung Cycas | 0 | 0 | 0 | 0 | 8 | 0 | 8 |
| Cuiyunlanggubai | 0 | 0 | 751 | 0 | 0 | 744 | 1495 |
| Dabashan | 0 | 0 | 300 | 0 | 0 | 0 | 300 |
| Dahongjiangshuiyuanlin | 0 | 0 | 0 | 0 | 305 | 0 | 305 |
| Dahuofangshuiyuanshuiku | 0 | 254 | 0 | 0 | 0 | 0 | 254 |
| Daiyunshan | 0 | 0 | 0 | 104 | 0 | 0 | 104 |
| Damingshanshuiyuanlin | 0 | 0 | 0 | 0 | 779 | 0 | 779 |
| Danda | 0 | 0 | 0 | 315 | 92 | 0 | 407 |
| Danshuei River Mangrove | 0 | 0 | 0 | 2 | 1 | 0 | 3 |
| Daomugou | 0 | 20 | 0 | 0 | 0 | 0 | 20 |
| Dashipenggou | 0 | 4 | 0 | 0 | 0 | 0 | 4 |
| Dawu Taiwan Keteleeria | 0 | 0 | 0 | 0 | 4 | 0 | 4 |
| Dawu Working Circle | 0 | 0 | 0 | 0 | 1 | 0 | 1 |
| Dawushan | 0 | 0 | 0 | 0 | 292 | 0 | 292 |
| Daxicha | 0 | 13 | 0 | 0 | 0 | 0 | 13 |
| Dayaoshanshuiyuanlin | 0 | 0 | 0 | 0 | 221 | 0 | 221 |
| Diaoluoshan | 0 | 0 | 0 | 0 | 24 | 0 | 24 |
| Dinghushan | 0 | 0 | 0 | 0 | 12 | 0 | 12 |
| Dingliao | 0 | 0 | 0 | 10 | 0 | 0 | 10 |
| Dong dongting hu | 2536 | 0 | 0 | 0 | 0 | 33 | 2569 |
| Donganshunhuangshan | 0 | 0 | 0 | 28 | 0 | 0 | 28 |
| Dongdongtinghu | 452 | 0 | 0 | 0 | 0 | 29 | 481 |
| Em Ei Shan | 0 | 0 | 256 | 0 | 0 | 281 | 537 |
| Encheng | 0 | 0 | 0 | 0 | 257 | 0 | 257 |
| Fangchengshangyuejinhuacha | 0 | 0 | 0 | 0 | 100 | 0 | 100 |
| Fanjia | 0 | 0 | 0 | 0 | 41 | 0 | 41 |
| Feitsui Reservoir | 0 | 0 | 0 | 19 | 6 | 0 | 25 |
| Fenghuangshan | 0 | 387 | 0 | 0 | 0 | 0 | 387 |
| Fengwugou | 0 | 710 | 0 | 0 | 0 | 0 | 710 |
| Fengxi | 0 | 0 | 0 | 4 | 0 | 0 | 4 |
| Fengyangshan-baishanzu | 0 | 0 | 0 | 206 | 0 | 0 | 206 |
| Formosan Landlocked Salmon Refuge | 0 | 0 | 0 | 42 | 0 | 0 | 42 |
| Ganjiangyuan | 0 | 0 | 0 | 41 | 0 | 0 | 41 |
| Geshikao | 0 | 0 | 0 | 1 | 0 | 0 | 1 |
| Gouxiheshidi | 0 | 0 | 432 | 0 | 0 | 432 | 864 |
| Guangfu | 46 | 0 | 0 | 0 | 0 | 0 | 46 |
| Guangningtuo | 0 | 0 | 0 | 0 | 7 | 0 | 7 |
| Guangshan Formosan Date Palm | 0 | 0 | 0 | 0 | 20 | 0 | 20 |
| Guangwushan | 0 | 0 | 151 | 0 | 0 | 39 | 190 |
| Guanshan | 0 | 0 | 0 | 154 | 72 | 0 | 226 |
| Guchenghu | 32 | 0 | 0 | 0 | 0 | 0 | 32 |
| Gulinqing | 0 | 0 | 0 | 0 | 6 | 0 | 6 |
| Guniujiang | 582 | 0 | 0 | 0 | 0 | 0 | 582 |
| Gutian | 0 | 0 | 0 | 0 | 26 | 0 | 26 |
| Gutianshan | 89 | 0 | 1 | 0 | 0 | 112 | 202 |
| Haiyangshanshuiyuanlin | 0 | 0 | 0 | 164 | 0 | 0 | 164 |
| Hangzhou Xixi Wetlands | 5 | 0 | 0 | 0 | 0 | 0 | 5 |
| Hapen | 0 | 0 | 0 | 7 | 0 | 0 | 7 |
| Heilonggong | 0 | 336 | 0 | 0 | 0 | 0 | 336 |
| Honghushidi | 579 | 0 | 0 | 0 | 0 | 0 | 579 |
| Hsinwulue River | 0 | 0 | 0 | 0 | 3 | 0 | 3 |
| Huang Shan | 237 | 0 | 0 | 0 | 0 | 0 | 237 |
| Huanglianshan | 0 | 0 | 0 | 0 | 36 | 0 | 36 |
| Huangnihe | 0 | 26 | 0 | 0 | 0 | 0 | 26 |
| Huangyoubi | 0 | 0 | 0 | 0 | 17 | 0 | 17 |
| Hubei Chen Lake | 159 | 0 | 0 | 0 | 0 | 0 | 159 |
| Hubei Shennongjia | 0 | 0 | 359 | 0 | 0 | 0 | 359 |
| Huishan | 0 | 0 | 0 | 0 | 37 | 0 | 37 |
| Jianfengling | 0 | 0 | 0 | 0 | 165 | 0 | 165 |
| Jiangnanlaoyinggou | 0 | 29 | 0 | 0 | 0 | 0 | 29 |
| Jiangxiwuyishan | 0 | 0 | 0 | 1281 | 0 | 0 | 1281 |
| Jianling | 0 | 0 | 0 | 0 | 16 | 0 | 16 |
| Jiaqiaolingshuiyuanlin | 0 | 0 | 0 | 0 | 10 | 0 | 10 |
| Jiaxi | 0 | 0 | 0 | 0 | 815 | 0 | 815 |
| Jia-xian Sih-de Fossil | 0 | 0 | 0 | 0 | 6 | 0 | 6 |
| Jingangtai | 2 | 0 | 125 | 0 | 0 | 0 | 127 |
| Jinganjiulingshan | 0 | 0 | 0 | 131 | 0 | 0 | 131 |
| Jingbohu | 0 | 1655 | 0 | 0 | 0 | 0 | 1655 |
| Jinggangshan | 0 | 0 | 0 | 281 | 0 | 0 | 281 |
| Jinhuasuoluo | 0 | 0 | 9 | 0 | 0 | 9 | 18 |
| Jin-shuei-ying | 0 | 0 | 0 | 0 | 12 | 0 | 12 |
| Jinyunshan | 18 | 0 | 397 | 0 | 0 | 454 | 869 |
| Jiufeng | 0 | 0 | 18 | 0 | 0 | 0 | 18 |
| Jiugongshan | 360 | 0 | 279 | 0 | 0 | 0 | 639 |
| Jiujiu Peaks | 0 | 0 | 0 | 0 | 18 | 0 | 18 |
| Jiulongchuan | 0 | 17 | 0 | 0 | 0 | 0 | 17 |
| Jiulongshan | 0 | 0 | 0 | 92 | 0 | 0 | 92 |
| Laoshan | 375 | 0 | 0 | 0 | 0 | 0 | 375 |
| Laotudingzi | 0 | 259 | 0 | 0 | 0 | 0 | 259 |
| Liangshui | 0 | 194 | 0 | 0 | 0 | 0 | 194 |
| Li-jia | 0 | 0 | 0 | 0 | 14 | 0 | 14 |
| Linghuashan | 0 | 0 | 0 | 4 | 0 | 0 | 4 |
| Lingnan | 407 | 0 | 248 | 0 | 0 | 32 | 687 |
| Liudingshan | 0 | 2 | 0 | 0 | 0 | 0 | 2 |
| Liufenghu | 0 | 22 | 0 | 0 | 0 | 0 | 22 |
| Liuyangdaweishan | 0 | 0 | 0 | 121 | 0 | 0 | 121 |
| Longganhu | 170 | 0 | 0 | 0 | 0 | 0 | 170 |
| Longshengou | 0 | 0 | 91 | 0 | 0 | 0 | 91 |
| Longwan | 0 | 267 | 0 | 0 | 0 | 0 | 267 |
| Luchang | 0 | 9 | 0 | 0 | 0 | 0 | 9 |
| Luhubailu-shidi | 0 | 0 | 17 | 0 | 0 | 17 | 34 |
| Luobuyannanmu | 0 | 0 | 0 | 49 | 0 | 0 | 49 |
| Luofushan | 0 | 0 | 0 | 0 | 29 | 0 | 29 |
| Lushan | 311 | 0 | 0 | 0 | 0 | 71 | 382 |
| Lushidani | 0 | 0 | 6 | 0 | 0 | 0 | 6 |
| Mangdangshan | 0 | 0 | 0 | 82 | 0 | 0 | 82 |
| Maoershan | 0 | 735 | 0 | 133 | 0 | 0 | 868 |
| Meihuashan | 0 | 0 | 0 | 300 | 53 | 0 | 353 |
| Miaoli Sanyi Huoyanshan | 0 | 0 | 0 | 0 | 4 | 0 | 4 |
| Mount Emei Scenic Area, | 0 | 0 | 7 | 0 | 0 | 7 | 14 |
| Mount Huangshan | 217 | 0 | 0 | 0 | 0 | 0 | 217 |
| Mount Sanqingshan National Park | 5 | 0 | 40 | 0 | 0 | 39 | 84 |
| Mount Wuyi | 0 | 0 | 0 | 1266 | 0 | 0 | 1266 |
| Mudanfeng | 0 | 307 | 0 | 0 | 0 | 0 | 307 |
| Mupinghu | 541 | 0 | 0 | 0 | 0 | 0 | 541 |
| Nabanheliuyu | 0 | 0 | 0 | 0 | 14 | 0 | 14 |
| Nalin | 0 | 0 | 0 | 0 | 46 | 0 | 46 |
| Nan Dongting | 1519 | 0 | 0 | 0 | 0 | 0 | 1519 |
| Nanchongtaiheluniao | 0 | 0 | 3 | 0 | 0 | 16 | 19 |
| Nankunshankuoyelin | 0 | 0 | 0 | 0 | 22 | 0 | 22 |
| Nanlin | 0 | 0 | 0 | 0 | 30 | 0 | 30 |
| Nanling | 0 | 0 | 0 | 30 | 0 | 0 | 30 |
| Nanshanchengsheshan | 0 | 38 | 0 | 0 | 0 | 0 | 38 |
| Nanyangkonglongdanhuashiqaun | 0 | 0 | 282 | 0 | 0 | 0 | 282 |
| Nanyuehengshan | 201 | 0 | 0 | 0 | 0 | 161 | 362 |
| Ningdulianhuashan | 0 | 0 | 0 | 1 | 0 | 0 | 1 |
| Niubeiliang | 0 | 0 | 8 | 0 | 0 | 0 | 8 |
| Niuluohe | 0 | 0 | 0 | 0 | 10 | 0 | 10 |
| Nonggang | 0 | 0 | 0 | 0 | 345 | 0 | 345 |
| Pat Sin Leng | 0 | 0 | 0 | 0 | 33 | 0 | 33 |
| Pinglin Taiwan Keteleeria | 0 | 0 | 0 | 18 | 0 | 0 | 18 |
| Plover Cove | 0 | 0 | 0 | 0 | 37 | 0 | 37 |
| Poyanghuchangjiangjiangtun | 109 | 0 | 0 | 0 | 0 | 56 | 165 |
| Poyanghuhouniao | 515 | 0 | 0 | 0 | 0 | 52 | 567 |
| Poyanghulijiyuchanluanchang | 342 | 0 | 0 | 0 | 0 | 175 | 517 |
| Qianfoshan | 0 | 0 | 60 | 0 | 0 | 0 | 60 |
| Qinglanhu | 0 | 0 | 0 | 0 | 0 | 27 | 27 |
| Qingliangfeng | 771 | 0 | 257 | 0 | 0 | 0 | 1028 |
| Qinglongshanshuiyuanlin | 0 | 0 | 0 | 0 | 224 | 0 | 224 |
| Qixinglazi | 0 | 72 | 0 | 0 | 0 | 0 | 72 |
| Qiyunshan | 0 | 0 | 0 | 147 | 0 | 0 | 147 |
| Ruei-yan River | 0 | 0 | 0 | 1 | 0 | 0 | 1 |
| Saiwudang | 0 | 0 | 40 | 0 | 0 | 0 | 40 |
| Sandaogouciqiulin | 0 | 17 | 0 | 0 | 0 | 0 | 17 |
| Shahe shuiziyuan | 0 | 0 | 0 | 0 | 12 | 0 | 12 |
| Shangxi | 0 | 0 | 0 | 0 | 30 | 0 | 30 |
| Shanhe | 0 | 12 | 0 | 0 | 0 | 0 | 12 |
| Shei-pa | 0 | 0 | 0 | 525 | 0 | 0 | 525 |
| Shennongjia | 0 | 0 | 131 | 0 | 0 | 0 | 131 |
| Shexianqingliangfeng | 192 | 0 | 0 | 0 | 0 | 0 | 192 |
| Shimentai | 0 | 0 | 0 | 0 | 434 | 0 | 434 |
| Shiwandashanshuiyuanlian | 0 | 0 | 0 | 0 | 2424 | 0 | 2424 |
| Shuang-guei Lake | 0 | 0 | 0 | 0 | 32 | 0 | 32 |
| Shuei-lian | 0 | 0 | 0 | 0 | 1 | 0 | 1 |
| Shuguang | 0 | 325 | 0 | 0 | 0 | 0 | 325 |
| Shuijiang | 0 | 0 | 0 | 25 | 0 | 0 | 25 |
| Simianshan | 0 | 0 | 111 | 0 | 0 | 111 | 222 |
| Songfengshan | 0 | 90 | 0 | 0 | 0 | 0 | 90 |
| Songhuajiangsanhu | 0 | 5501 | 0 | 0 | 0 | 0 | 5501 |
| Songtao shuiyuanlin | 0 | 0 | 0 | 0 | 109 | 0 | 109 |
| South China Karst | 0 | 0 | 0 | 0 | 134 | 0 | 134 |
| Susu | 0 | 178 | 0 | 0 | 0 | 0 | 178 |
| Taibaishan | 0 | 0 | 53 | 0 | 0 | 0 | 53 |
| Taihangshangmihou | 0 | 0 | 96 | 0 | 0 | 0 | 96 |
| Taipei City Waterbird Refuge | 0 | 0 | 0 | 1 | 1 | 0 | 2 |
| Taitung Hongye Village Taitung Cycas | 0 | 0 | 0 | 0 | 1 | 0 | 1 |
| Tangjiahe | 0 | 0 | 1 | 0 | 0 | 0 | 1 |
| Taohongling | 132 | 0 | 0 | 0 | 0 | 53 | 185 |
| Taoyuandong | 0 | 0 | 0 | 278 | 0 | 0 | 278 |
| Taroko | 0 | 0 | 0 | 571 | 0 | 0 | 571 |
| Tianbaoyan | 0 | 0 | 0 | 28 | 0 | 0 | 28 |
| Tiangangchaoyang | 0 | 75 | 0 | 0 | 0 | 0 | 75 |
| Tianma | 152 | 0 | 252 | 0 | 0 | 0 | 404 |
| Tianmushan | 262 | 0 | 35 | 0 | 0 | 0 | 297 |
| Tongluoba | 0 | 0 | 30 | 0 | 0 | 30 | 60 |
| Touersantan | 0 | 0 | 284 | 0 | 0 | 0 | 284 |
| Tumenzishuiku | 0 | 40 | 0 | 0 | 0 | 0 | 40 |
| Wanwanchuan | 0 | 26 | 0 | 0 | 0 | 0 | 26 |
| Wenziling | 0 | 72 | 0 | 0 | 0 | 0 | 72 |
| Wudangshan | 0 | 0 | 261 | 0 | 0 | 0 | 261 |
| Wudaoxia | 0 | 0 | 52 | 0 | 0 | 0 | 52 |
| Wufubaodingshuiyuanlin | 0 | 0 | 0 | 80 | 0 | 0 | 80 |
| Wuhua qirifeng | 0 | 0 | 0 | 24 | 24 | 0 | 48 |
| Wuyanling | 0 | 0 | 0 | 107 | 0 | 0 | 107 |
| Wuyishan | 0 | 0 | 0 | 371 | 0 | 0 | 371 |
| Wuyuanchanglvkuoyelin | 0 | 0 | 0 | 0 | 0 | 40 | 40 |
| Wuyuanhongzuixiangsiniao | 0 | 0 | 0 | 0 | 0 | 3 | 3 |
| Wuyuanyuanyanghu | 0 | 0 | 0 | 0 | 0 | 11 | 11 |
| Wuzhishan | 0 | 0 | 0 | 0 | 352 | 0 | 352 |
| Xiangtoushan | 0 | 0 | 0 | 0 | 65 | 0 | 65 |
| Xiaohegou | 0 | 0 | 162 | 0 | 0 | 0 | 162 |
| Xidamingshanshuiyuanlin | 0 | 0 | 0 | 0 | 534 | 0 | 534 |
| Xidaquan | 0 | 12 | 0 | 0 | 0 | 0 | 12 |
| Xinfengjinpenshan | 0 | 0 | 0 | 12 | 0 | 0 | 12 |
| Xinglongsha | 49 | 0 | 0 | 0 | 0 | 43 | 92 |
| Xinkaihe | 0 | 26 | 0 | 0 | 0 | 0 | 26 |
| Xishuangbanna | 0 | 0 | 0 | 0 | 1652 | 0 | 1652 |
| Xue-ba | 0 | 0 | 0 | 6 | 0 | 0 | 6 |
| Yaluzangbudaxiagu | 0 | 0 | 24 | 0 | 0 | 14 | 38 |
| Yangchengmanghemihou | 0 | 0 | 126 | 0 | 0 | 0 | 126 |
| Yangchunbaiyong | 0 | 0 | 0 | 0 | 47 | 0 | 47 |
| Yangmingshan | 0 | 0 | 0 | 175 | 17 | 0 | 192 |
| Yangxianzhuhuan | 0 | 0 | 239 | 0 | 0 | 0 | 239 |
| Yangzie | 12675 | 0 | 131 | 0 | 0 | 1 | 12807 |
| Yanminghu | 0 | 15 | 0 | 0 | 0 | 0 | 15 |
| Yanquan | 0 | 0 | 0 | 5 | 0 | 0 | 5 |
| Yantingbailu | 0 | 0 | 256 | 0 | 0 | 281 | 537 |
| Yihuanghuananhu | 0 | 0 | 0 | 682 | 0 | 0 | 682 |
| Yilan County Shuang-lian-Pi | 0 | 0 | 0 | 10 | 0 | 0 | 10 |
| Yinjiabianyangzi'e | 115 | 0 | 0 | 0 | 0 | 0 | 115 |
| Yinzhulaoshanlengshan | 0 | 0 | 0 | 71 | 0 | 0 | 71 |
| Yitonghuoshanqun | 0 | 10 | 0 | 0 | 0 | 0 | 10 |
| Youxianshuiqinshidi | 0 | 0 | 17 | 0 | 0 | 17 | 34 |
| Yukeng | 0 | 0 | 0 | 78 | 0 | 0 | 78 |
| Yunjishan | 0 | 0 | 0 | 0 | 34 | 0 | 34 |
| Yunlin Huben Fairy Pitta | 0 | 0 | 0 | 0 | 24 | 0 | 24 |
| Yunnandaweishan | 0 | 0 | 0 | 0 | 347 | 0 | 347 |
| Yushan | 0 | 0 | 0 | 0 | 12 | 0 | 12 |
| Zhenzhushan | 0 | 0 | 5 | 0 | 0 | 33 | 38 |
| Ziyunwanfengshan | 0 | 0 | 0 | 89 | 0 | 0 | 89 |
| Zuojia | 0 | 79 | 0 | 0 | 0 | 0 | 79 |

The values represent the number of grid cells containing priority conservation areas.

Fig. S1. Distribution probabilities of PSESP under current, low and high greenhouse gas concentration scenarios. The colour from yellow to blue represents increasing distribution probability for PSESP.


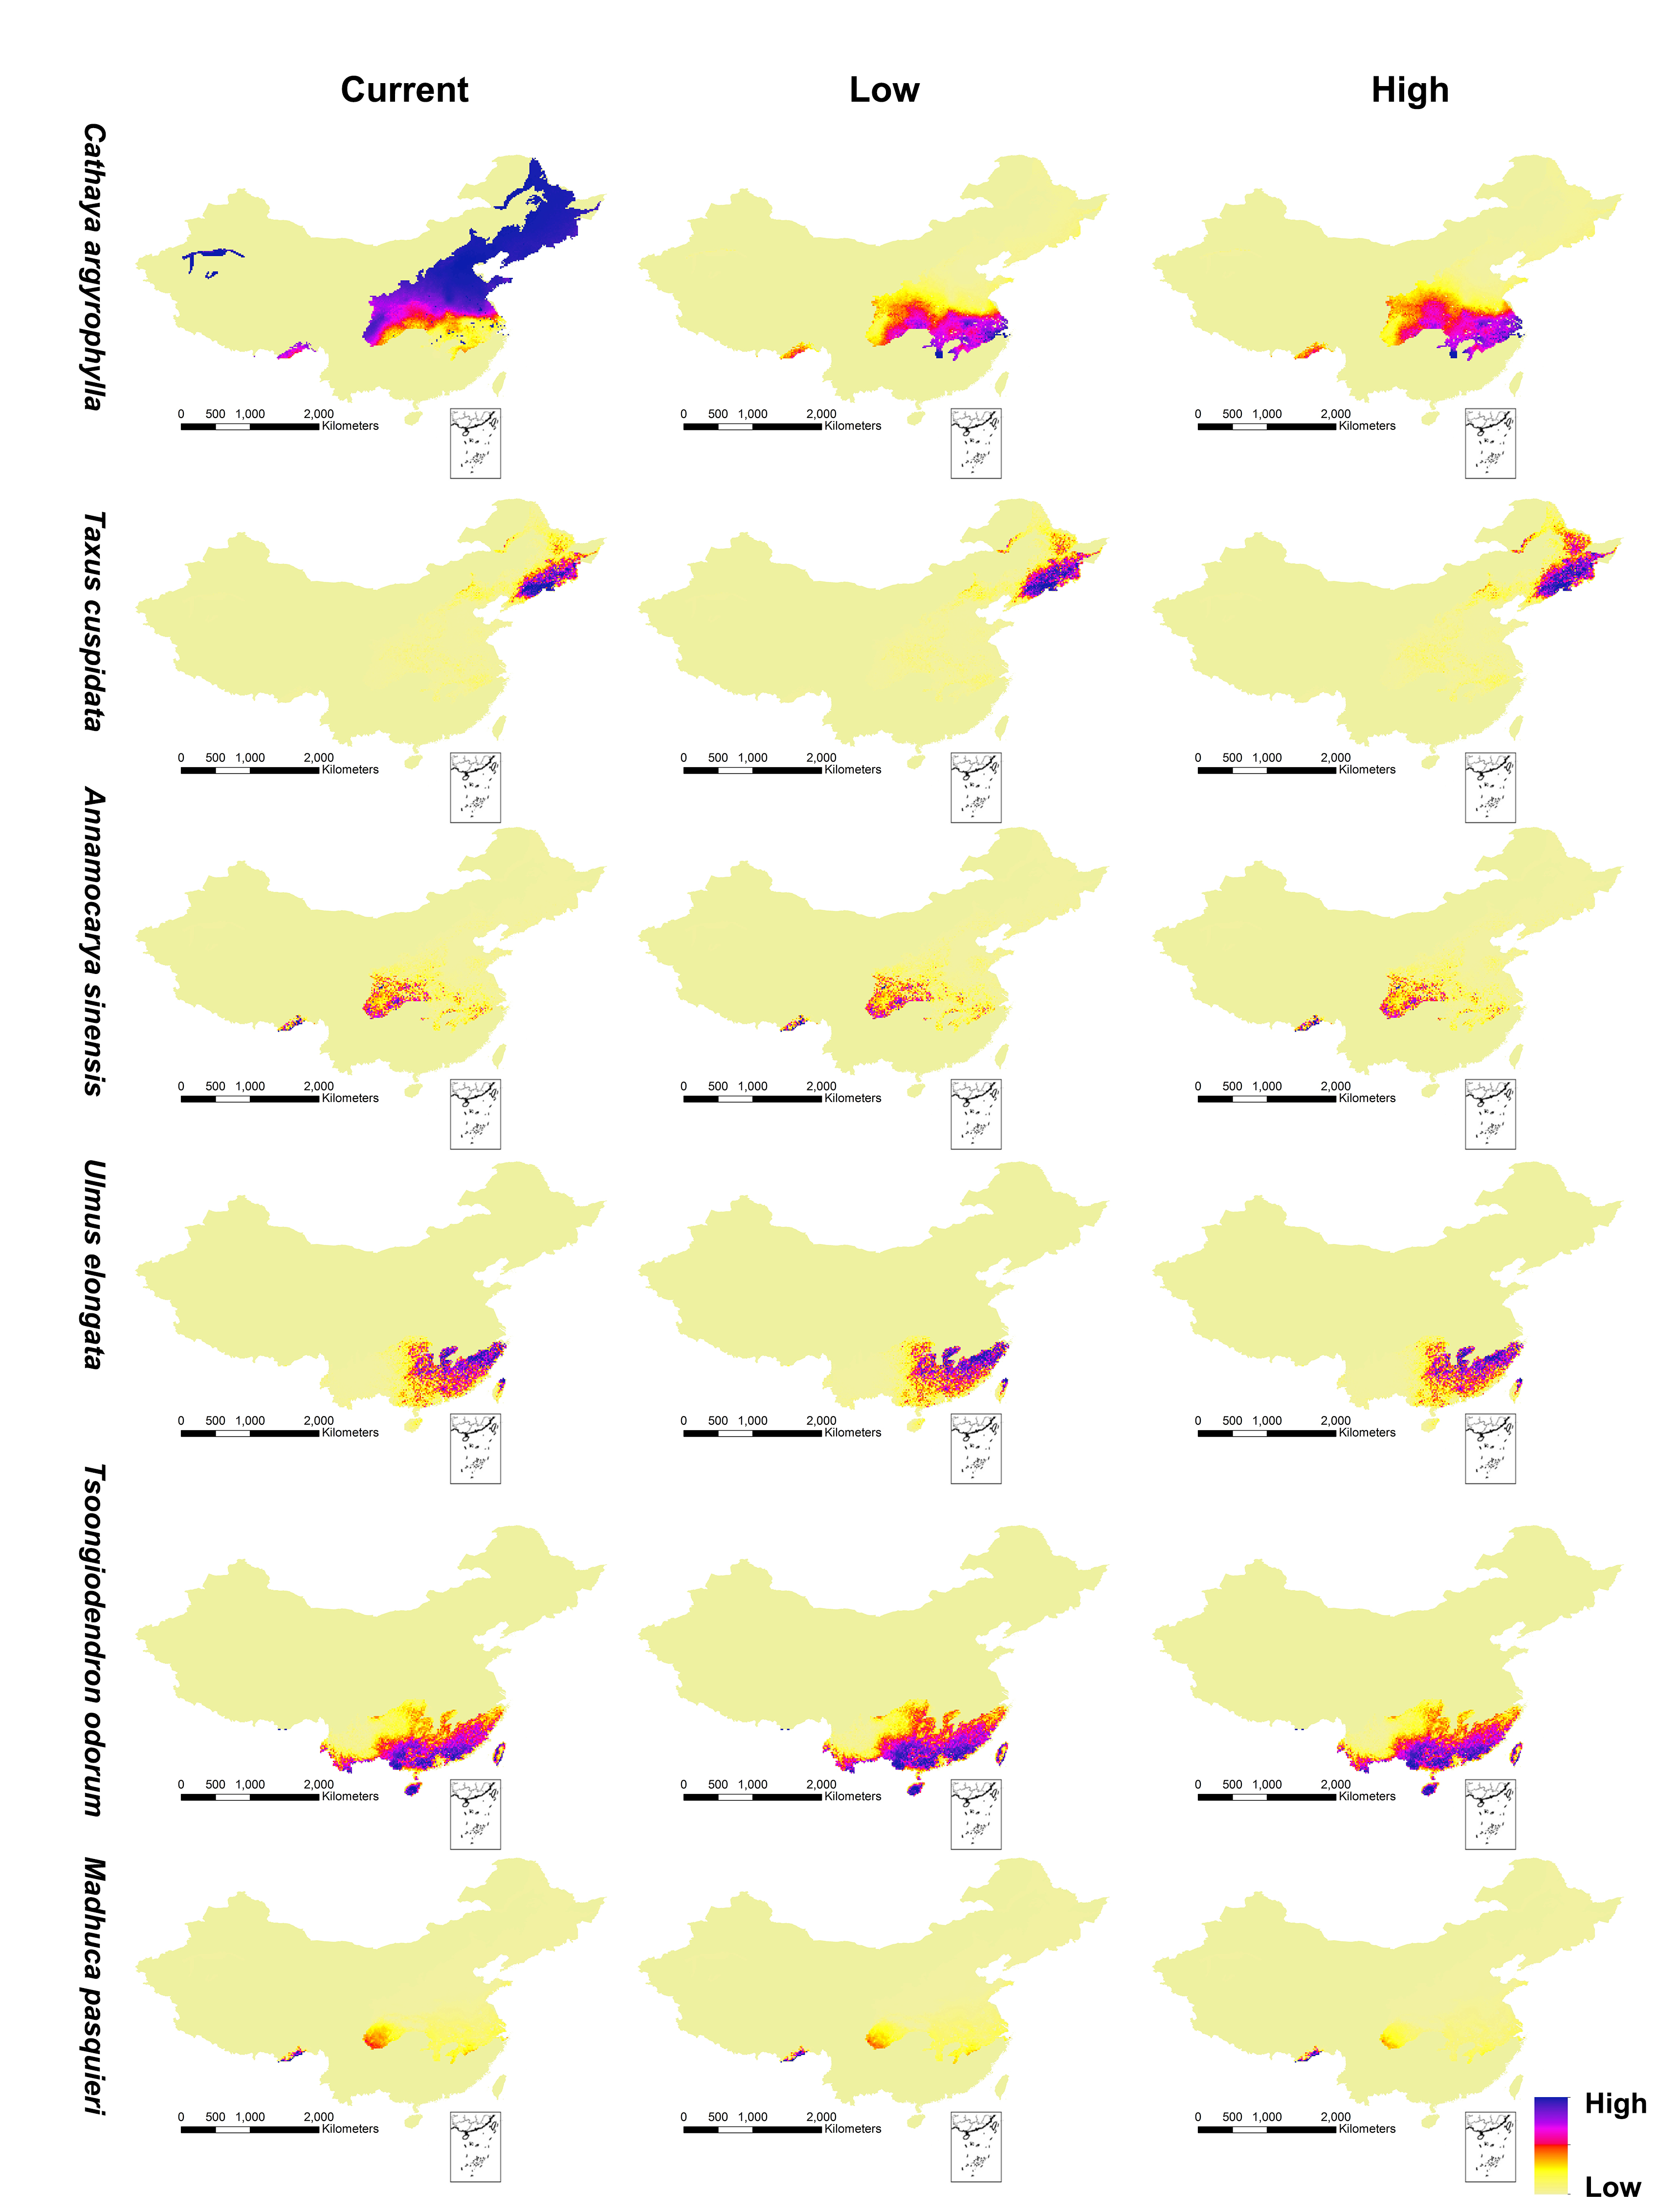


Fig. S2. Priority conservation rank of PSESP. The colour from yellow to blue represents increasing priority conservation rank for PSESP.


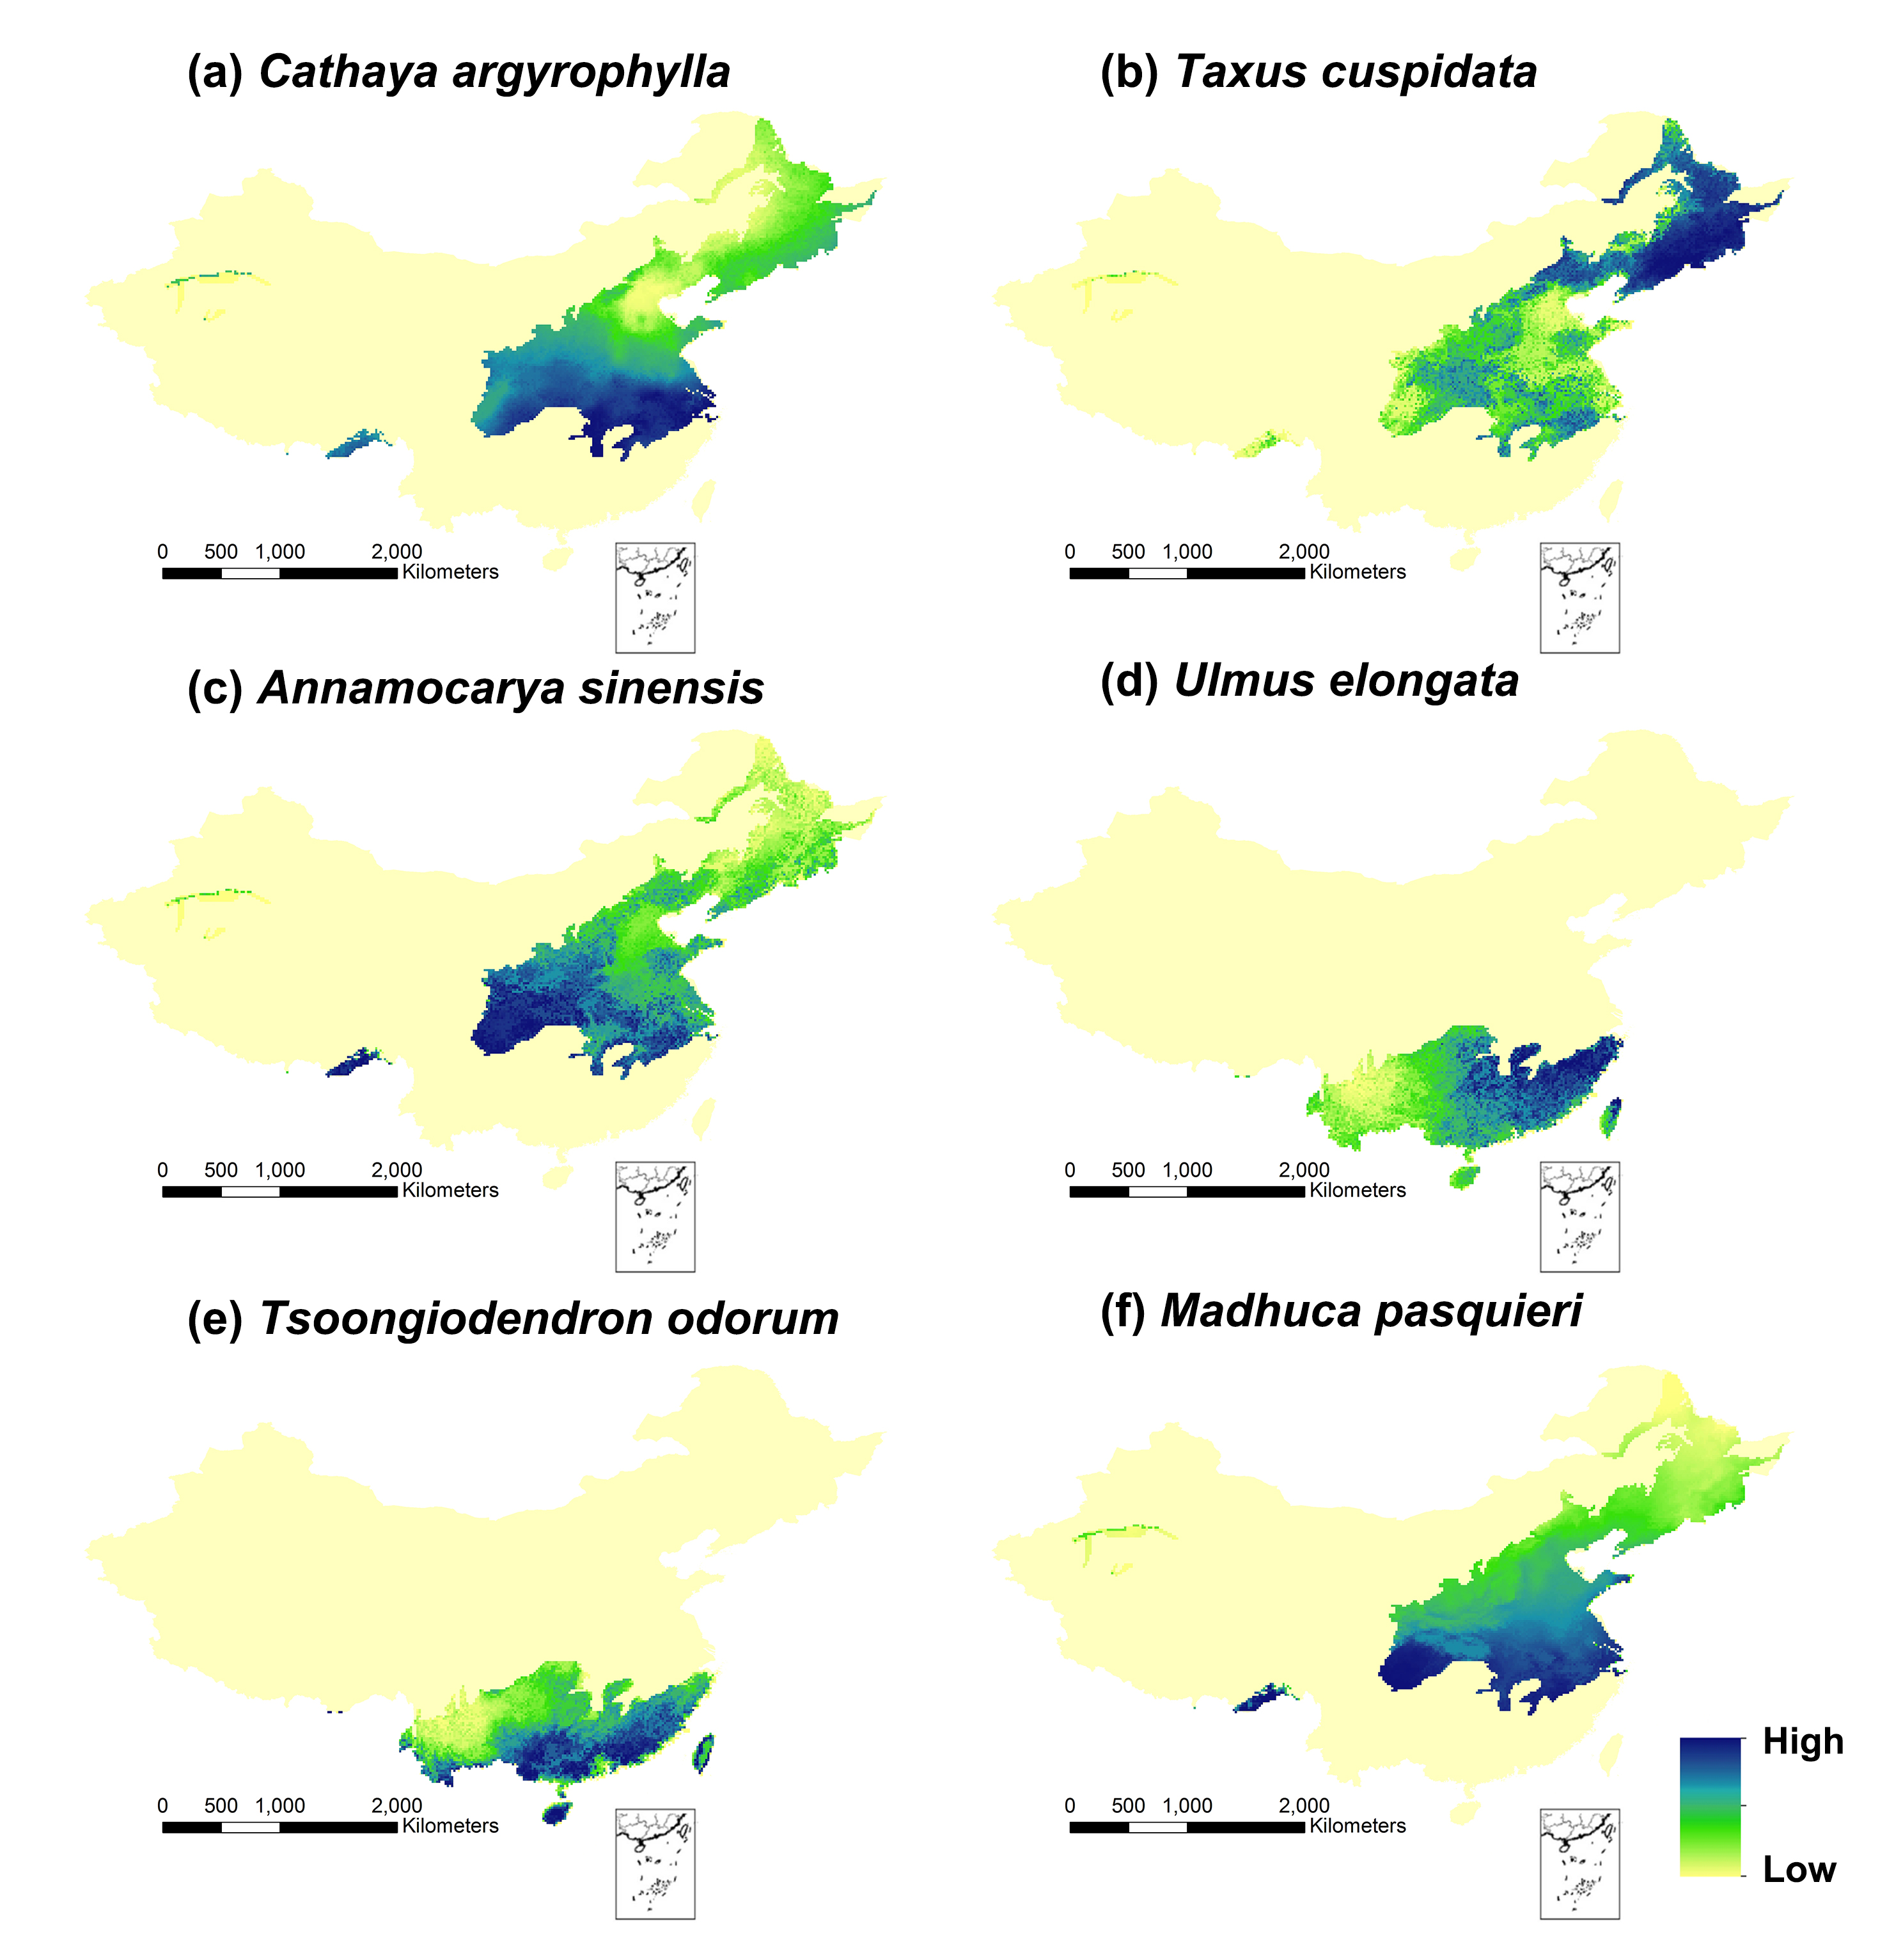

Supplement: Supplementary file 1
